---

1 Swine Growth Promotion with Antibiotics or Alternatives  
2 Increases Antibiotic Resistance Gene Mobility Potential in  
3 the Fecal Microbiome

---

4  
5 Johanna Muurinen,<sup>a#</sup> Jacob Richert,<sup>b</sup> Carmen Wickware,<sup>a</sup> Brian Richert,<sup>a</sup> and Timothy  
6 Johnson<sup>a#</sup>

7  
8 <sup>a</sup>Department of Animal Sciences, Purdue University, West Lafayette, Indiana, USA

9 <sup>b</sup>Department of Animal Sciences & Industry, Kansas State University, Manhattan, Kansas, USA

10  
11 Running Title: Growth Promotion Mobilizes Antimicrobial Resistance

12  
13 #Address correspondence to Johanna Muurinen and Timothy Johnson,  
14 [johanna.muurinen@onehealth.fi](mailto:johanna.muurinen@onehealth.fi) and [john2185@purdue.edu](mailto:john2185@purdue.edu), respectively.

15

## 16 Abstract

17 The use of antimicrobials in animal production has been shown to increase the abundance of  
18 antibiotic resistance genes (ARGs) in microbiomes and it is recommended by international health  
19 organizations that the use of antimicrobial growth promoters would be restricted. Consequently,  
20 the use alternative growth promoters is increasing, however, their influence on the collection of  
21 ARGs (the resistome) in the animal microbiome is understudied. We investigated the impact of  
22 different growth promoters on the pig fecal resistome and microbiome. The growth promoters  
23 were carbadox (antibiotic), copper sulfate and zinc oxide (metal) or mushroom powder (natural  
24 product). Six pens of seven weanling piglets per treatment were used in a growth trial and after  
25 33 days, fecal samples were taken from one median weight female and male pig per pen.  
26 Samples from the same pen were pooled, and DNA was isolated. The community composition  
27 was investigated by 16S rRNA gene sequencing and relative ARG and mobile genetic element  
28 (MGE) abundances were measured using qPCR array with 382 primers. Only modest shifts were  
29 observed in community structure and resistome in response to growth promoters, but more ARGs  
30 were co-occurring with MGEs in growth promoter group samples than in the control group  
31 samples. The taxonomic structure could not be linked to resistome structure in the growth  
32 promoter groups. The ARG–MGE co-occurrence patterns suggest that replacing the use of  
33 antibiotics with alternative growth promoters might be an insufficient antibiotic resistance  
34 mitigation strategy and active selection against ARGs will require a more comprehensive  
35 approach.

## 36 Importance

37 Due to increasing antimicrobial drug resistance of pathogenic bacteria, international  
38 organizations are advising livestock and poultry industries to limit the use of antimicrobials in  
39 growth promotion. Together with growing consumer concerns towards antimicrobials, the

40 markets are favorable to alternative growth promoters. Since the interest towards enhancing  
41 animal productivity and health through microbiomes is also increasing, it is important to study  
42 the linkages between the resistome and bacterial community structure to avoid enriching ARGs  
43 in animal microbiomes. Our study explores the influences of different growth promoters on the  
44 bacterial community and resistome compositions and we show that resistance gene mobility  
45 should be taken into account when considering the changes in agricultural antibiotic use policies.

## 46 Introduction

47 Antibiotics have been used in pork production to prevent diseases and to increase productivity  
48 since the 1940's (1, 2). Due to the established connection of antibiotic use in animals and the  
49 emergence of antibiotic resistance in pathogenic bacteria (e.g. 3), in 2017, the use of medically  
50 important antibiotics as growth promoters was prohibited in the U.S. (4) Additionally, a report to  
51 the Secretary General of the United Nation suggests that antibiotic growth promoters should be  
52 completely phased out from livestock production (5). Currently, the livestock industry is  
53 adapting to reduced antibiotic use for growth promotion and because consumer concerns towards  
54 antibiotic use in animal agriculture are increasing, the markets are favorable to antibiotic  
55 alternatives (6, 7).

56 Despite the increasing restrictions, some antibiotics can still be used for growth  
57 promotion of animals, but interest towards antibiotic-alternative growth promoters is increasing  
58 rapidly. Among the antibiotics that are still allowed for growth promotion, carbadox is used in  
59 pigs mainly to control dysentery and bacterial enteritis. Carbadox can cause short-term but also  
60 long-lasting alterations in the microbiome (8) and can promote the mobility of antibiotic  
61 resistance genes (ARGs) through transduction (9). Numerous antibiotic alternatives are currently  
62 under study for their efficacy to promote animal growth and gastrointestinal health. Of special  
63 interest among natural products that can be used in growth promotion are medicinal mushrooms.

64 *Cordyceps militaris* and *Ophiocordyceps sinensis* (formerly *C. sinensis*) produce many bioactive  
65 compounds, such as Cordycepin and Beta-Glucan, which have antimicrobial effects and can  
66 enhance the immune system (10). Zinc (Zn) and copper (Cu) are important trace elements for all  
67 organisms and livestock animals commonly receive feed supplements that ensure their required  
68 concentration in the feed. Higher concentrations of Zn and Cu can be used for controlling various  
69 bacterial infections in livestock animals, such as diarrheal diseases (7) and also for growth  
70 promotion (7, 11, 12). However, use of Zn oxide has shown to select zoonotic methicillin  
71 resistant *Staphylococcus aureus* (MRSA) and multiresistant *E. coli* (13–16). In-feed  
72 supplemented Cu can increase the prevalence of erythromycin resistance in gram-positive  
73 bacteria (17) and various plasmid-mediated resistance genes in microbiomes (16, 18). Thus, it  
74 seems that alternative growth promoters may also select ARGs similarly as the antibiotics they  
75 are meant to replace.

76 Several studies have found that metals and growth promotion antimicrobials can select  
77 for antibiotic resistance and promote horizontal gene transfer, but the capability of natural  
78 products to select resistance and increase resistance gene mobility is currently understudied. It  
79 has also shown that the taxonomic composition may explain resistance composition (19, 20).  
80 Since growth promoters alter the gut microbial community composition, it has been proposed  
81 that the microbiota composition could be manipulated to act as a “growth promoter” by inducing  
82 populations favorable to animal growth and gut health (21). Therefore, it would be important to  
83 determine if the populations linked to induced animal growth carry resistance genes and mobile  
84 genetic elements (MGEs). However, making connections between taxonomic data and resistance  
85 gene data can be challenging, since microbiome datasets are compositional and rarely meet  
86 assumptions of normality that many statistical tests require (22, 23). In addition, it has been  
87 pointed out that different normalization strategies could influence the results derived from  
88 sequence data (24, 25).

89           In order to examine the influence of carbadox, cordyceps mushroom powder and  
90 pharmacological concentrations of Zn and Cu on the community composition and resistome (26),  
91 we took fecal samples from pigs that were administered these growth promoters, extracted DNA,  
92 analyzed 16S rRNA gene sequences and quantified genes related to resistance and gene transfer  
93 with 382 primer pairs using high-throughput qPCR array (27, 28). We also compared two 16S  
94 rRNA gene sequence normalization strategies using statistical analyses that are suitable for  
95 compositional data. Our results suggest that inclusion of ARGs into MGEs led to uncoupling of  
96 bacterial community composition and resistome composition in response to growth promotion,  
97 highlighting the importance of MGEs in shaping the resistomes under the influence of  
98 antimicrobial agents.

## 99 **Results**

### 100 **Samples and data quality control**

101           Samples were collected from pigs that had been assigned into non-treatment control  
102 group (NTC = no antibiotic or alternative growth promoters), or one of the growth promoter  
103 groups (AB = carbadox, M = mushroom powder mixture of *C. militaris* and *O. sinensis*, ZnCu =  
104 Zn oxide and Cu sulfate). Each treatment group consisted of six pens and each pen had seven  
105 pigs. The DNA for 16S rRNA gene sequencing was extracted from combined fecal samples of  
106 one medium weight female and male per pen. After quality filtering, a total of 741,785 sequences  
107 were obtained. For 22 samples sequences per sample ranged from 11,392 to 67,072. Two  
108 samples were discarded due to low number of sequences, resulting in five samples in the NTC  
109 and AB groups. The data analysis for 16S rRNA gene sequencing was completed using two  
110 different methods: rarefaction and subsampling or total sum scaling (TSS). The TSS normalized  
111 16S rRNA gene sequence data had 132 observed taxonomical units (OTUs), while rarefied and  
112 subsampled 16S rRNA gene sequence data 127 OTUs. The same DNA samples were used for

113 qPCR array analysis to examine how the treatments altered the resistome. One hundred and  
114 thirty-six assays out of 382 assays (Table S1) targeting antibiotic resistance genes (ARGs) or  
115 mobile genetic elements (MGEs) were positive. See materials and methods for qPCR data  
116 processing and Ct value adjustment for four assays that had unspecific amplification.

117 **The profiles of most abundant genera and genes were similar in different treatment**  
118 **groups**

119 To take into account the influence of normalization of 16S rRNA gene sequence reads on  
120 the results, we used two different normalization methods. Only small differences were  
121 discovered between TSS normalized and rarefied and subsampled OTUs among the most  
122 abundant genera (Fig. 1A and B). The TSS normalized OTUs and rarefied and subsampled  
123 OTUs correlated significantly ( $\rho = 0.97$ ,  $p < 0.05$ ) (Fig. S1), indicating the agreement of the  
124 overall community composition of the two normalization methods. *Prevotella* was the most  
125 abundant genera in all treatments and all samples had several short chain fatty acid producers  
126 (Fig. 1A and B). Very few OTUs were found only in one treatment group with both  
127 normalization methods and a majority of the OTUs were found in all treatment groups, however  
128 more OTUs were found in all treatment groups using TSS normalization than rarefied and  
129 subsampled normalization (Fig. 1D and E).

130 The different treatment groups also had similar resistome profiles (Fig. 1C). The NTC  
131 had the highest number of positive assays (110), the AB group had 106 positive assays, The M  
132 group had 100 positive assays and the ZnCu group had 103 positive assays. Twenty-eight genes  
133 were detected in only one treatment group, but most genes were found in all treatment groups  
134 (Fig. 1F). Out of the positive assays, 108 targeted ARGs and 28 MGEs. Among the detected  
135 ARGs, altogether 63 conferred resistance to aminoglycosides, MLSBs or tetracyclines and the  
136 most common resistance mechanism was antibiotic deactivation (Fig. S2A and B). Among  
137 MGEs, most positive assays targeted insertion sequences (12) or transposases (7) (Fig. S2C).

## 138 Growth promoters favored different genera, ARGs and MGEs

139 Generalized linear models (GLMs) were used for testing which genera, ARGs and MGEs  
140 differed in abundance between treatments. Mostly only minor differences in abundance of  
141 different genera were found between treatment groups (Fig. S3A and B). Compared to all other  
142 growth promoters, carbadox favored unclassified *Veillonellaceae* in feces and decreased the  
143 abundance of *Streptococcus*, whereas Zn and Cu decreased the abundance of *Bifidobacterium*  
144 and *Campylobacter* ( $p < 0.05$ , gamma distribution GLMs [TSS OTUs] and negative binomial  
145 GLMs [rarefied and subsampled OTUs]) (Fig. 2A and B, Table S2 and S3). Mushroom powder  
146 decreased the abundance of fecal *Roseburia* and favored *Campylobacter* compared to other  
147 treatments ( $p < 0.05$ , gamma distribution GLMs [TSS OTUs] and negative binomial GLMs  
148 [rarefied and subsampled OTUs]) (Fig. 2A and B, Table S2 and S3). *Streptococcus* were more  
149 abundant in M and ZnCu group samples compared to other groups ( $p < 0.05$ , gamma distribution  
150 GLMs [TSS OTUs] and negative binomial GLMs [rarefied and subsampled OTUs]) (Fig. 2A and  
151 B, Table S2 and S3). More ARGs and MGEs were differentially abundant in NTC group and M  
152 group compared to ZnCu and AB groups (Fig. S3C). Compared to other growth promoters,  
153 carbadox and Zn and Cu increased the relative abundance of *vat(E)*, mushroom powder increased  
154 the relative abundance of *tetW*, and Zn and Cu favored *tetM* ( $p < 0.05$ , gamma distribution  
155 GLMs) (Fig. 2C, Table S4). Interestingly, carbadox treatment decreased the relative abundance  
156 of six antibiotic resistance genes of the most abundant and differentially abundant ARGs and  
157 MGEs compared to other treatments or to NTC group ( $p < 0.05$ , gamma distribution GLMs) (Fig.  
158 2C, Table S4).

159 Both OTU normalization methods yielded similar results for differential OTU abundance  
160 in the treatment groups (Fig. 2A and B). The exceptions were that *Phascolarctobacterium* was  
161 among the differentially abundant genera when TSS normalization was used, whereas  
162 *Faecalibacterium* was differentially abundant when rarefying and subsampling was used (Fig.

163 2A and B) and that more genera were differentially abundant when TSS normalization was used  
164 (Table S2 and Table S3).

## 165 Growth promoters had modest influences on overall bacterial community composition 166 and resistome

167 With both TSS normalized OTUs and rarefied and subsampled OTUs, the treatment  
168 group explained 24% of the variability in community composition (PERMANOVA,  $R^2 = 0.239$ ,  
169  $p < 0.05$ ). With ARGs and MGEs, the treatment group explained 27% of the variability  
170 (PERMANOVA,  $R^2 = 0.267$ ,  $p < 0.05$ ). The number of sequences per sample was also included  
171 as a variable in the PERMANOVA model with both normalization methods, but the library size  
172 did not have influence on the community variability in our samples ( $p > 0.05$ ).

173 The different growth promoters altered the community composition and resistome only  
174 slightly, since in all non-metric multidimensional scaling (NMDS) ordinations the samples  
175 belonging to different treatment groups clustered close to each other with mostly overlapping  
176 centroid confidence intervals (Fig. 3A, B and D). In ordinations of TSS normalized and rarefied  
177 and subsampled OTU-tables, the ZnCu group tended to cluster further away from the other  
178 samples indicating more dissimilar community composition (Fig. 3A and B), however there were  
179 no significant differences between treatment groups among pairwise PERMANOVA  
180 comparisons. In the ordination of the ARG and MGE data, there was no separation between  
181 ZnCu group and the other groups, instead the M group clustered slightly separately (Fig. 2D) and  
182 in the pairwise comparisons using the ARG and MGE data, M vs. AB group explained 32% of  
183 the variance (PERMANOVA,  $R^2 = 0.321$ ,  $p < 0.05$ ), but in all the other pairwise comparisons the  
184 differences were nonsignificant ( $p > 0.05$ )



185 Taxonomic variation did not explain resistome variation in growth promoter group  
186 samples

187 The OTU ordinations were correlated against each other and against the ARG and MGE  
188 NMDS ordination using Procrustes analysis to determine if the taxonomic variation explains  
189 resistome variation. The two OTU NMDS ordinations had reasonably high (0.7) and significant  
190 ( $p < 0.05$ ) correlation and the Procrustes residual error remained lower than 0.25 in all samples  
191 except one (Fig. 3C). The correlation between the rarefied and subsampled OTU ordination  
192 (which did not include all the data due to subsampling) and the ARG and MGE ordination was  
193 moderately high (0.6,  $p < 0.05$ ) and there was no pattern in Procrustes residual errors across  
194 different samples (Fig. 3F). Contrariwise, the correlation between the TSS normalized OTU  
195 ordination (that included all quality filtered data) and the ARG and MGE ordination was  
196 nonsignificant ( $p > 0.05$ ) and Procrustes residual errors were high in most samples not belonging  
197 to NTC group, in which the residual errors were mostly equal or less than the first quantile  
198 residual value (Fig. 3E). The Procrustes analyses performed on TSS normalized OTUs and  
199 resistome implies that taxonomic variation explained resistance variation in NTC samples with  
200 less error. However, growth promoters altered the resistome, resulting higher residual errors in  
201 samples belonging to AB, M and ZnCu groups and thus the overall correlation between TSS  
202 normalized OTU ordination and ARG and MGE ordination was not significant (Procrustes  
203 analysis,  $p > 0.05$ ).

204 The links between bacterial community structure and resistome were further examined  
205 with Mantel's test using Spearman's rank correlation. The correlation coefficients between  
206 distance matrix of TSS normalized OTUs and ARGs and MGEs distance matrix as well as the  
207 distance matrix of rarefied and subsampled OTUs and ARGs and MGEs distance matrix were  
208 low ( $\rho = 0.25$  and  $\rho = 0.23$ , respectively,  $p < 0.05$ ), which suggests that the phylogenetic  
209 composition did not govern the resistome composition when all samples were included in the

210 analysis. We also used Mantel's test for all treatment groups individually. With NTC group and  
211 both OTU normalization methods, the bacterial community distance matrix correlated  
212 significantly with the distance matrix obtained from ARGs and MGEs ( $\rho = 0.66$  [TSS OTUs]  
213 and  $\rho = 0.62$  [rarefied and subsampled OTUs],  $p < 0.05$ ). With all growth promoter groups and  
214 both OTU normalization methods, the correlations between OTU and ARG and MGE distance  
215 matrixes were nonsignificant, giving more evidence that the growth promoters shaped the  
216 resistance composition and thus taxonomic variation did not explain the resistance variation in  
217 the growth promoter group samples. It should be denoted that we had only five or six samples in  
218 each treatment group, however, the results were consistent, since the correlations between  
219 taxonomic structure and resistome were reasonably high and significant in NTC group and  
220 nonsignificant in all other groups.

### 221 Growth promoters increased the co-occurrences of ARGs and MGEs

222 A correlation matrix between ARG and MGE relative abundances was visualized using  
223 network analysis to examine if the growth promoters selected resistance genes into mobile  
224 genetic elements. The network of NTC group was simpler compared to growth promoter group  
225 networks as the number of correlating ARGs and MGEs increased in response to growth  
226 promotion (Fig. 4). There were no integrons co-occurring with resistance genes in the NTC  
227 group network, but integrons were present in all the growth promoter group networks (Fig. 4)  
228 and co-occurred with many ARGs. AB and M group networks had more aminoglycoside  
229 resistance genes than other networks and M group also had the most multidrug resistance genes,  
230 but the least tetracycline resistance genes, whereas AB group network had the most vancomycin  
231 resistance genes (Fig. 4).

232 Transposase gene for insertion sequence-like element IS1216 was the best predictor for  
233 resistance and community composition

234 We used machine learning approaches to identify drivers of change in community  
235 composition. First, a cluster analysis was performed on a combined data table of TSS normalized  
236 OTUs and ARGs and MGEs using *t*-distributed stochastic neighbor embedding (t-SNE)  
237 algorithm (29) and HDBSCAN algorithm (30). Then, a classification random forests model (31,  
238 32) was used for identifying the predictors for the clustering pattern. Three clusters were  
239 identified after dimension reduction. Most of the samples belonged to cluster 2, while cluster 1  
240 had two ZnCu samples, one M group sample and one AB group sample, and cluster 3 contained  
241 only three ZnCu samples (Fig. 5A). According to the partial dependence plot that shows the most  
242 important predictors found by the classification random forests model, clusters 1 and 3 were  
243 separated from cluster 2 due to higher abundance of transposase gene linked to IS1216 element  
244 and from each other because the abundance of *tetO* was lower in cluster 3 (Fig. 5B). Five of the  
245 nine best predictors for clustering pattern were MGEs and ARGs and four were bacterial genera  
246 (Fig. 5B). Interestingly, most of the samples belonging to clusters 1 and 3 originate from  
247 animals, which were kept in pens that were close to each other (five out of seven) (Fig. 5C).  
248 Unfortunately, we could not analyze the possible influence of the pen location, since we had only  
249 one sample from each pen and only 21 samples in the statistical analysis using both taxonomy  
250 and resistome data. In addition, only one of the ZnCu group samples belongs to the cluster 2 with  
251 most of the samples and since all the other ZnCu samples clustered to clusters 1 and 3. Thus,  
252 growth promotion with Zn and Cu might cause more alterations in the community composition  
253 and resistome than the other growth promoters examined in this study.

## 254 Discussion

255 Our study explores the influences of antibiotic and alternative growth promoters on the  
256 pig fecal resistome, resistome mobility, and bacterial community composition. We did not have  
257 an alternative growth promoter that would not have antimicrobial effects in our study; however,  
258 the abundances of ARGs and MGEs were on similar level in the non-treatment control group and  
259 the growth promoter groups. Our results indicate that it is unlikely that changing the substance  
260 that is used for growth promotion would reduce antimicrobial resistance in the pig fecal  
261 microbiome at least in a short period of time (33 days in this study). Gut bacteria, especially  
262 gram-negative species, are known to carry many ARGs and MGEs and the gastro-intestinal tract  
263 is suspected to be a major hotspot for horizontal gene transfer (33, 34). These observations have  
264 also been made with individuals without antibiotic exposure (35, 36).

265 Interestingly, many ARGs were less abundant in the AB group than in the NTC group  
266 and alternative growth promotion groups. A potential explanation for this could be that carbadox  
267 is a broad acting antibiotic and effects most bacterial populations equally when carbadox  
268 resistance is not present (8). Overall, we did not observe large shifts among genera as a result of  
269 growth promotion feed additives. *Bifidobacteria*, which have been previously linked to lower  
270 antibiotic resistance level (37, 38), were somewhat more abundant in the NTC and M group  
271 samples; however, in this study the ARG abundances in samples belonging to different groups  
272 were similar. It is possible that the shifts in the community composition caused by growth  
273 promoters were small with high variability and thus the changes in the community structure are  
274 difficult to capture with community-wide molecular approaches.

275 We were able to link the resistome structure to taxonomic structure only in the NTC  
276 group samples. In all other samples we did not find the connection between resistome and  
277 community composition. Some have reported that community composition predicts resistance  
278 profile (19, 20, 39), while others have reported that under the presence of a selective pressure

279 phylogeny and resistance profile become uncoupled (40). Our network analysis revealed that  
280 growth promoters increased linkages between ARGs and MGEs. It seems possible that the  
281 growth promoters would have increased the horizontal gene transfer mechanisms in the pig gut  
282 microbiome and thus more ARGs were incorporated into MGEs in the resistome of growth  
283 promoter group pigs than in the resistome of NTC group pigs. Another possible scenario is that  
284 bacteria carrying more complex MGEs would have tolerated the growth promoters better than  
285 bacteria carrying simpler MGEs, possible due to more variability in stress response mechanisms  
286 (16, 41). Despite the mechanism, more ARGs co-occurring with MGEs in response to growth  
287 promotion could indicate more persistent resistance gene collection (42).

288         Taken alone, the rarefied and subsampled OTU data and TSS normalized OTU data  
289 mostly agreed; however, in Procrustes analysis, the rarefied and subsampled OTU data correlated  
290 significantly with the resistome data when all samples were used, although the same analysis  
291 using the TSS normalized data as input showed that the taxonomic data did not explain  
292 resistance. It is important to understand that rarefying and subsampling captures the most  
293 abundant OTUs for each sample (25) and discards rare OTUs. Additionally, OTU abundances in  
294 different samples are slightly adjusted. If the sample size and differences in OTU abundances are  
295 small before the procedure, the shifts might change the outcome if OTU data is used in  
296 comparison with data obtained using a different method. Thus, researchers making connections  
297 between taxonomic data and resistome observations should use multiple methods to confirm  
298 their findings.

299         Although the shifts in community composition and resistome were modest and mostly  
300 nonsignificant, we were able to find differences in community structures with machine learning  
301 methods. The differences we observed did not precisely follow the experimental grouping, and  
302 therefore they were not found with commonly used ordination methods or differential abundance  
303 analysis. The transposase gene linked to IS1216 element that was the driver for the clustering

304 result has been previously associated to Gram-positive bacteria (40, 43) and since this element  
305 was abundant in seven samples belonging to two smaller clusters in our analysis, it is tempting to  
306 speculate that the populations in the larger cluster were more dominated by Gram-negative  
307 bacteria, which are known to spread easily within pig herds. Since the clustering pattern  
308 somewhat followed the locations of experimental pens, it could indicate that spreading of  
309 bacteria between animals may be one of the factors shaping microbiomes and resistomes.  
310 However, evaluating the ARG disseminating potential of bacteria spreading between the animals  
311 is not possible with our experimental design and would require further studies.

## 312 Conclusions

313 Under this experimental design, the withdrawal of antibiotics did not decrease antibiotic  
314 resistance, however, we did not observe enrichment of antimicrobial resistance in response to  
315 growth promotion either. Instead our results show that growth promoters increased the  
316 connections between ARGs and MGEs, which indicates that all tested growth promoters can  
317 increase and maintain resistance gene mobility. Only modest changes in the community  
318 composition and resistome and increased linkages between ARGs and MGEs suggests that  
319 MGEs may be even more important vehicles in dissemination of antimicrobial resistance under  
320 the influence of growth promoters than the selection pressure caused by used substances.  
321 Therefore, we suggest that more attention should be paid to resistance gene mobility potential in  
322 antimicrobial resistance surveillances.

## 323 Materials and methods

### 324 Animal experiment statement

325 All procedures involving animal use were approved by the Purdue University Animal  
326 Care and Use Committee (protocol #1303000841), and animal care and use standards were based  
327 upon the Guide for the Care and Use of Agricultural Animals in Research and Teaching (44).

### 328 Samples and DNA

329 The pig fecal samples were obtained from growth promoter experiment where 210  
330 weanling pigs ((Duroc × (York × Landrace)) avg. 19 d of age and 5.8 kg were used in a 33-day  
331 trial. The experiment had 7 pigs in each pen and 6 pens per each treatment. Feed amendment  
332 treatments were: 1) non-treatment control (NTC); 2) antibiotic growth promoter (carbadox, 55  
333 ppm) (AB); 3) mushroom powder (mixture of *C. militaris* and *O. sinensis*, 300 ppm) (M); 4)  
334 carbadox and mushroom powder mixture (results are not included in this study); 5) copper  
335 sulfate (125 ppm) and zinc oxide (3000 ppm d 0-7, 2000 ppm d 7-35) (ZnCu). After 33 days,  
336 fecal samples were taken from 1 median weight female and male per pen. Samples from the  
337 same pen were pooled, and DNA was extracted using the DNeasyPowerLyzer PowerSoil DNA  
338 Isolation Kit (Qiagen) according to the manufacturer's protocol. Extracted DNA was stored at  
339 −20 °C before 16S sequencing and qPCR array.

### 340 16S sequencing and quantitative PCR array

341 The 16S rRNA gene library was constructed as described (45). Briefly, the V4 region of  
342 the bacterial 16S rRNA gene was amplified with the 515R (GTGCCAGCMGCCGCGGTAA) /  
343 806R (GGACTACHVGGGTWTCTAAT) primers. 16S rRNA gene libraries were also prepared  
344 for a known mock community (20 Strain Even Mix Genomic Material; ATCC® MSA-1002TM)  
345 and a no-template control (water). The amplified DNA from one 96-well plate was normalized  
346 using a SequalPrep Normalization Plate (Invitrogen), and pooled into a single library. Library

347 concentrations were determined using the KAPA Library Quantification Kit (Roche) and the  
348 average fragment length was determined using a high sensitivity kit with the Bioanalyzer  
349 (Agilent). The pooled samples, mock community, and water were sequenced with Illumina  
350 MiSeq v2 (500 cycles). Sequences were demultiplexed using oligonucleotide bar code sequences  
351 and Illumina software.

352 Quantitative PCR reactions and raw data processing were conducted using WaferGen  
353 SmartChip Real-time PCR system as reported previously (46). The qPCR reactions were  
354 performed using 384 primer sets (assays) (Table S1) (27). One sample from M group (2\_M) was  
355 not included in the qPCR array analysis due to technical error. Samples from pigs that received  
356 both mushroom powder and carbadox were also excluded and therefore the results from 16S  
357 rRNA amplicon sequencing are not presented in this study.

### 358 16S sequence analysis and qPCR array data processing

359 The 16S rRNA amplicon sequences were analyzed using mothur (v 1.39.3) (45): contigs  
360 were made from paired forward and reverse raw reads, aligned to reference sequences (SILVA  
361 database release 132) (47), screened and filtered to remove low quality reads (ambiguous bases  
362 allowed = 0, maximum read length = 275, homopolymers allowed = 8), classified with reference  
363 to known taxonomic classifications (RDP training set 16) (48) and clustered into OTUs. The  
364 sequences clustered into 137 different OTUs at the 3% dissimilarity level. One NTC group  
365 sample (11\_NTC) and one AB group sample (16\_AB) were discarded due to low number of  
366 obtained sequences. 16S sequences were normalized using two different methods: total sum  
367 scaling (TSS) using R and rarefying and subsampling using mothur. To produce the rarefied and  
368 subsampled OTU table, the data were subsampled to 7,500 reads per sample according to  
369 rarefaction curves (Fig. S6). The rarefied and subsampled OTU table and only quality filtered  
370 OTU table (for TSS) were imported into R. After removing the results of samples from animals  
371 that received both mushroom powder and carbadox, 132 different OTUs remained in the TSS



372 normalized OTU table and 127 different OTUs in the rarefied and subsampled OTU table. The  
373 TSS normalization was carried out in R by dividing each OTU read count by the total number of  
374 reads in that sample and all the NA observations (zero sequences) were replaced with 1.490935e-  
375 07, which was 100-fold lower than the lowest observed relative abundance.

376 In the qPCR array, assays “16S old 1\_1”, “blaOXY-1\_1118”, “cmlV\_911”,  
377 “czcA\_1536”, “fabK\_1520”, “intI1F165\_clinical\_359” and “tetPA\_1507” were positive in the  
378 negative control, however the Ct-values in the negative control were mostly higher than in  
379 experimental samples (Table S5). Assay “tetPA\_1507” was detected only in the negative control  
380 and the Ct-values of assay “czcA\_1536” were removed from the results since they were lower in  
381 the negative control than in samples. Assay “16S old 1\_1” results were removed and not used in  
382 normalization since DNA amplification was more efficient in assay “16S new 2\_2”. The Ct-  
383 values of the remaining four assays that were positive in the negative control were adjusted as  
384 follows: The Ct values of each of these assays in each sample were subtracted from Ct value of  
385 the assay in the negative control. The resulting numbers were then subtracted from 27, which  
386 was the Ct value was used as the cutoff between true positive values and primer-dimer  
387 amplification. Next, all the Ct values that were higher than 27 were set to “NA”. After this, all  
388 the assays that were undetected in all the samples were removed, resulting in 136 assays out of  
389 382 targeting to AGRs or MGEs being included in the data table. The  $\Delta$ Ct values,  $\Delta\Delta$ Ct values  
390 and relative gene abundances were calculated from these Ct values as previously described (27).  
391 Genes under the detection limit were given a  $\Delta$ Ct value of 20, which was higher than any  
392 observed  $\Delta$ Ct (17.4).

### 393 **Statistical analyses**

394 R version 3.5.1 (2018-07-02) was used for data exploration, visualization and for all  
395 statistical analyses. Analysis of differential abundances of taxa and ARGs and MGEs were  
396 carried out using gamma distribution GLMs with TSS normalized OTUs and ARGs and MGEs

397 (relative abundances) and negative binomial GLMs with rarefied and subsampled OTUs  
398 (abundance). Gamma distribution model was selected because the relative abundance values  
399 (TSS normalized OTUs and ARGs and MGEs) did not fit to normal distribution but followed the  
400 gamma distribution. Negative binomial models were selected for rarefied and subsampled OTUs  
401 because of the overdispersion in the abundance data. With both model types, p-values were  
402 obtained with Tukey's post-hoc test and adjusted with False discovery rate control (49) using  
403 *glht* function in the multcomp package (50).

404         The community and resistome compositions were analyzed using vegan package (51).  
405 PERMANOVA was used to examine the shifts in community composition and resistome  
406 between treatment groups with function *adonis* and 9,999 permutations. Nonmetric  
407 multidimensional scalings (NMDS) were completed using the Bray–Curtis dissimilarity index  
408 with function *metaMDS*. Procrustes analysis with the *protest* function was used to examine the  
409 agreement of ordinations of TSS normalized OTUs and rarefied and subsampled OTUs as well  
410 as ordination of ARGs and MGEs and both OTU ordinations separately. Mantel's test and  
411 Spearman's rank correlation was used to analyze the links between microbial community  
412 structure and resistome: first, Bray-Curtis dissimilarity indexes were calculated for TSS  
413 normalized OTUs, rarefied and subsampled OTUs and for ARGs and MGEs with function  
414 *vegdist*. Then the *mantel* function was applied for the dissimilarity indexes of TSS normalized  
415 OTUs and ARGs and MGEs as well as rarefied and subsampled OTUs and ARGs and MGEs.  
416 Mantel's tests between both OTU dissimilarity matrices and dissimilarity matrix of ARGs and  
417 MGEs were also run for all the treatment groups separately.

418         To examine if the treatments selected resistance genes into mobile genetic elements, a  
419 correlation matrix between ARG and MGE relative abundances was visualized using network  
420 analysis with Gephi (52). Spearman's rank correlations between ARGs and MGEs within  
421 treatment groups and their *p*-values used in network analysis were obtained with package psych

422 (53) using False discovery rate control (49). Only ARG-MGE-pairs that were detected at least in  
423 three samples with a strong positive correlation ( $\rho > 0.8$ ,  $p < 0.05$ ) were included.

424 The factors influencing the shifts in taxonomic structure and resistome were analyzed  
425 with machine learning algorithms as previously described (54). First, dimension reduction was  
426 executed on a combined data table of TSS normalized OTUs and ARGs and MGEs using t-SNE  
427 algorithm (29) and the R package Rtsne (55), with 50,000 iterations and “perplexity” set to 5.  
428 Then, clusters in the two-dimensional data were identified using HDBSCAN algorithm (30) in  
429 the package dbscan (56). The minimum number of members in clusters (“minPts”) was set to 3.  
430 Classification random forest model (31) was used with partial dependence plot function in edarf  
431 package (57) for identifying the most important predictors for the clustering pattern. The forests  
432 were grown to 10,000 trees using the ranger package (58) and the best predictors were screened  
433 using Gini index by adding predictors one at a time in the order of decreasing importance (59).  
434 The final model was then selected according to the highest Cohen's Kappa (comparison of  
435 observed accuracy and expected accuracy).

#### 436 Data availability

437 Raw reads from 16S rRNA gene amplicon sequencing are deposited under BioProject  
438 accession number PRJNA605462 at NCBI. The R code, mothur commands and all datasets used  
439 in statistical analyses are available at <https://github.com/sjmuurine/ZnCu>.

#### 440 Acknowledgements

441 We thank Ms. Olivia Consoli for excellent technical assistance in laboratory analysis and  
442 Purdue University for internal financial support. Information Technology at Purdue is  
443 acknowledged for providing computational resources.

## 444 References

- 445 1. Economou V, Gousia P. 2015. Agriculture and food animals as a source of antimicrobial-  
446 resistant bacteria. *Infection and Drug Resistance* 8:49–61. doi:10.2147/IDR.S55778
- 447 2. Dibner JJ, Richards JD. 2005. Antibiotic growth promoters in agriculture: history and  
448 mode of action. *Poultry Science* 84:634–643. doi: 10.1093/ps/84.4.634
- 449 3. Marshall BM, Levy SB. 2011. Food animals and antimicrobials: Impacts on human  
450 health. *Clinical Microbiology Reviews* 24:718–733. doi:10.1128/CMR.00002-11
- 451 4. Centner TJ. 2016. Recent government regulations in the United States seek to ensure the  
452 effectiveness of antibiotics by limiting their agricultural use. *Environ Int* 94:1–7.  
453 doi:10.1016/j.envint.2016.04.018.
- 454 5. Interagency Coordination Group on Antimicrobial Resistance (IACG). 2019. No time to  
455 wait: securing the future from drug-resistant infections. [https://www.who.int/antimicrobial-  
456 resistance/interagency-coordination-group/IACG\\_final\\_report\\_EN.pdf?ua=1](https://www.who.int/antimicrobial-resistance/interagency-coordination-group/IACG_final_report_EN.pdf?ua=1)
- 457 6. Thacker PA. 2013. Alternatives to antibiotics as growth promoters for use in swine  
458 production: a review. *J Anim Sci Biotechnol* 4:35–35. doi:0.1186/2049-1891-4-35
- 459 7. Willing BP, Pepin DM, Marcolla CS, Forgie AJ, Diether NE, Bourrie BCT. 2018.  
460 Bacterial resistance to antibiotic alternatives: A wolf in sheep’s clothing? *Animal Frontiers* 8:39–  
461 47. doi:10.1093/af/vfy003
- 462 8. Looft T, Allen HK, Casey TA, Alt DP, Stanton TB. 2014. Carbadox has both temporary  
463 and lasting effects on the swine gut microbiota. *Frontiers in Microbiology* 5:1–1.  
464 doi:10.3389/fmicb.2014.00276
- 465 9. Johnson TA, Looft T, Severin AJ, Bayles DO, Nasko DJ, Wommack KE, Howe A, Allen  
466 HK. 2017. The in-feed antibiotic carbadox induces phage gene transcription in the swine gut  
467 microbiome. *mBio* 8:1–14. doi:10.1128/mBio.00709-17
- 468 10. Richert J, Palencia JY, Thayer MT, Chastain C, Richert B, Nelssen JL. 2018. Effects of

- 469 Cordyceps Mushroom Powder on Nursery Pig Performance. Kansas Agricultural Experiment  
470 Station Research Reports 4. doi:10.4148/2378-5977.7668
- 471 11. Di Giancamillo A, Rossi R, Martino PA, Aidos L, Maghin F, Domeneghini C, Corino C.  
472 2018. Copper sulphate forms in piglet diets: Microbiota, intestinal morphology and enteric  
473 nervous system glial cells. *Animal Science Journal* 89:616–624. doi:10.1111/asj.12948
- 474 12. Jacela JY, DeRouchey JM, Tokach MD, et al. Feed additives for swine: Fact sheets –  
475 high dietary levels of copper and zinc for young pigs, and phytase. *J Swine Health Prod.*  
476 2010;18(2):87–91. <http://hdl.handle.net/2097/13585>
- 477 13. Slifierz MJ, Friendship R, Weese JS. 2015. Zinc Oxide Therapy Increases Prevalence and  
478 Persistence of Methicillin-Resistant *Staphylococcus aureus* in Pigs: A Randomized Controlled  
479 Trial. *Zoonoses and Public Health* 62:301–308. doi:10.1111/zph.12150
- 480 14. Bednorz C, Oelgeschläger K, Kinnemann B, Hartmann S, Neumann K, Pieper R, Bethe  
481 A, Semmler T, Tedin K, Schierack P, Wieler LH, Guenther S. 2013. The broader context of  
482 antibiotic resistance: zinc feed supplementation of piglets increases the proportion of multi-  
483 resistant *Escherichia coli* in vivo. *International journal of medical microbiology: IJMM* 303:396–  
484 403. doi:10.1016/j.ijmm.2013.06.004
- 485 15. Ciesinski L, Guenther S, Pieper R, Kalisch M, Bednorz C, Wieler LH. 2018. High dietary  
486 zinc feeding promotes persistence of multi-resistant *E. coli* in the swine gut. *PLoS ONE* 13:1–18.  
487 doi:10.1371/journal.pone.0191660
- 488 16. Poole K. 2017. At the Nexus of Antibiotics and Metals: The Impact of Cu and Zn on  
489 Antibiotic Activity and Resistance. *Trends in Microbiology* 25:820–832.  
490 doi:10.1016/j.tim.2017.04.010
- 491 17. Van Noten N, Gorissen L, De Smet S. 2016. Assistance in the update of the systematic  
492 literature review (SLR): “Influence of copper on antibiotic resistance of gut microbiota on pigs  
493 (including piglets).” EFSA Supporting publications 13. <http://hdl.handle.net/1854/LU-7142409>

- 494 18. Fang L, Li X, Li L, Li S, Liao X, Sun J, Liu Y. 2016. Co-spread of metal and antibiotic  
495 resistance within ST3-IncHI2 plasmids from *E. coli* isolates of food-producing animals.  
496 *Scientific Reports* 6:25312. doi:10.1038/srep25312.
- 497 19. Munk P, Knudsen BE, Lukjacenko O, Duarte ASR, Van Gompel L, Luiken REC, Smit  
498 LAM, Schmitt H, Garcia AD, Hansen RB, Petersen TN, Bossers A, Ruppé E, Graveland H, van  
499 Essen A, Gonzalez-Zorn B, Moyano G, Sanders P, Chauvin C, David J, Battisti A, Caprioli A,  
500 Dewulf J, Blaha T, Wadepohl K, Brandt M, Wasyl D, Skarzyńska M, Zajac M, Daskalov H,  
501 Saatkamp HW, Stärk KDC, Lund O, Hald T, Pamp SJ, Vigre H, Heederik D, Wagenaar JA,  
502 Mevius D, Aarestrup FM. 2018. Abundance and diversity of the faecal resistome in slaughter  
503 pigs and broilers in nine European countries. *Nature Microbiology* 3:898–908.  
504 doi:10.1038/s41564-018-0192-9
- 505 20. Forsberg KJ, Patel S, Gibson MK, Lauber CL, Knight R, Fierer N, Dantas G. 2014.  
506 Bacterial phylogeny structures soil resistomes across habitats. *Nature* 509:612–6. doi  
507 doi.org/10.1038/nature13377
- 508 21. Ward TL, Weber BP, Mendoza KM, Danzeisen JL, Llop K, Lang K, Clayton JB, Grace  
509 E, Brannon J, Radovic I, Beauclaire M, Heisel TJ, Knights D, Cardona C, Kogut M, Johnson C,  
510 Noll SL, Arsenault R, Reed KM, Johnson TJ. 2019. Antibiotics and host-tailored probiotics  
511 similarly modulate effects on the developing avian microbiome, mycobiome, and host gene  
512 expression. *mBio* 10:1–17. doi:10.1128/mBio.02171-19
- 513 22. Gloor GB, Macklaim JM, Pawlowsky-Glahn V, Egozcue JJ. 2017. Microbiome Datasets  
514 Are Compositional: And This Is Not Optional. *Frontiers in Microbiology* 8:2224.  
515 doi:10.3389/fmicb.2017.02224
- 516 23. Zuur AF, Ieno EN, Elphick CS. 2010. A protocol for data exploration to avoid common  
517 statistical problems. *Methods in Ecology and Evolution* 1:3–14. doi:10.1111/j.2041-  
518 210X.2009.00001.x

- 519 24. McMurdie PJ, Holmes S. 2014. Waste Not, Want Not: Why Rarefying Microbiome Data  
520 Is Inadmissible. *PLoS Computational Biology* 10. doi:10.1371/journal.pcbi.1003531
- 521 25. Weiss S, Xu ZZ, Peddada S, Amir A, Bittinger K, Gonzalez A, Lozupone C, Zaneveld  
522 JR, Vázquez-Baeza Y, Birmingham A, Hyde ER, Knight R. 2017. Normalization and microbial  
523 differential abundance strategies depend upon data characteristics. *Microbiome* 5:27–27.  
524 doi:10.1186/s40168-017-0237-y
- 525 26 Wright, G. 2007. The antibiotic resistome: the nexus of chemical and genetic diversity.  
526 *Nature Reviews Microbiology* 5:175–186. <https://doi.org/10.1038/nrmicro1614>
- 527 27. Muurinen J, Karkman A, Virta M. 2017. High Throughput Method for Analyzing  
528 Antibiotic Resistance Genes in Wastewater Treatment Plants, p. 253–262. *In* *Antimicrobial*  
529 *Resistance in Wastewater Treatment Processes*. John Wiley & Sons, Inc.  
530 doi:10.1002/9781119192428.ch14
- 531 28. Stedtfeld RD, Guo X, Stedtfeld TM, Sheng H, Williams MR, Hauschild K, Gunturu S,  
532 Tift L, Wang F, Howe A, Chai B, Yin D, Cole JR, Tiedje JM, Hashsham SA. 2018. Primer set  
533 2.0 for highly parallel qPCR array targeting antibiotic resistance genes and mobile genetic  
534 elements. *FEMS Microbiology Ecology* 94. doi:10.1093/femsec/fiy130.
- 535 29. van der Maaten LJP. 2014. Accelerating t-SNE using Tree-Based Algorithms. *Journal of*  
536 *Machine Learning Research* 15:3221-3245 <http://jmlr.org/papers/v15/vandermaaten14a.html>
- 537 30. Campello RJGB, Moulavi D, Sander J. 2013. Density-Based Clustering Based on  
538 Hierarchical Density Estimates, p. 160–172. *In* Pei, J, Tseng, VS, Cao, L, Motoda, H, Xu, G  
539 (eds.), *Advances in Knowledge Discovery and Data Mining*. Springer Berlin Heidelberg, Berlin,  
540 Heidelberg. doi: 10.1007/978-3-642-37456-2\_14
- 541 31. Breiman L. 2001. Random Forests. *Machine Learning* 45:5–32. doi:  
542 10.1023/A:1010933404324
- 543 32. Liaw A, Wiener M. 2002. Classification and regression by randomForest. *R news* 2:18–



- 544 22. [https://cran.r-project.org/doc/Rnews/Rnews\\_2002-3.pdf](https://cran.r-project.org/doc/Rnews/Rnews_2002-3.pdf)
- 545 33. Davies J, Davies D. 2010. Origins and Evolution of Antibiotic Resistance. *Microbiology*  
546 *and Molecular Biology Reviews* 74:417–433. doi:10.1128/MMBR.00016-10
- 547 34. Netherwood T, Bowden R, Harrison P, O'Donnell AG, Parker DS, Gilbert HJ. 1999.  
548 Gene transfer in the gastrointestinal tract. *Applied and environmental microbiology* 65:5139–41.
- 549 35. Moore AM, Ahmadi S, Patel S, Gibson MK, Wang B, Ndao IM, Deych E, Shannon W,  
550 Tarr PI, Warner BB, Dantas G. 2015. Gut resistome development in healthy twin pairs in the first  
551 year of life. *Microbiome* 3:27. doi:10.1186/s40168-015-0090-9.
- 552 36. Gibson MK, Wang B, Ahmadi S, Burnham C-AD, Tarr PI, Warner BB, Dantas G. 2016.  
553 Developmental dynamics of the preterm infant gut microbiota and antibiotic resistome. *Nature*  
554 *Microbiology* 1:16024. doi:10.1038/nmicrobiol.2016.24
- 555 37. Pärnänen K, Karkman A, Hultman J, Lyra C, Bengtsson-Palme J, Larsson DGJ, Rautava  
556 S, Isolauri E, Salminen S, Kumar H, Satokari R, Virta M. 2018. Maternal gut and breast milk  
557 microbiota affect infant gut antibiotic resistome and mobile genetic elements. *Nature*  
558 *Communications* 9:3891. doi:10.1038/s41467-018-06393-w
- 559 38. Taft DH, Liu J, Maldonado-Gomez MX, Akre S, Huda MN, Ahmad SM, Stephensen CB,  
560 Mills DA. 2018. Bifidobacterial Dominance of the Gut in Early Life and Acquisition of  
561 Antimicrobial Resistance. *mSphere* 3:1–24. doi:10.1128/mSphere.00441-18
- 562 39. Su JQ, Wei B, Ou-Yang WY, Huang FY, Zhao Y, Xu HJ, Zhu YG. 2015. Antibiotic  
563 Resistome and Its Association with Bacterial Communities during Sewage Sludge Composting.  
564 *Environmental Science and Technology* 49:7356–7363. doi:10.1021/acs.est.5b01012
- 565 40. Johnson TA, Stedtfeld RD, Wang Q, Cole JR, Hashsham SA, Looft T, Zhu Y. 2016.  
566 Clusters of Antibiotic Resistance Genes Enriched Together *Stay* 7:1–11.  
567 doi:10.1128/mBio.02214-15
- 568 41. Poole K. 2012. Bacterial stress responses as determinants of antimicrobial resistance.



- 569 Journal of Antimicrobial Chemotherapy 67:2069–2089. doi:10.1093/jac/dks196
- 570 42. Enne VI, Delsol AA, Davis GR, Hayward SL, Roe JM, Bennett PM. 2005. Assessment of  
571 the fitness impacts on *Escherichia coli* of acquisition of antibiotic resistance genes encoded by  
572 different types of genetic element. *Journal of Antimicrobial Chemotherapy* 56:544–551.  
573 doi:10.1093/jac/dki255
- 574 43. Partridge SR, Kwong SM, Firth N, Jensen SO. 2018. Mobile Genetic Elements  
575 Associated with Antimicrobial Resistance. *Clin Microbiol Rev* 31:e00088-17.  
576 doi:10.1128/CMR.00088-17
- 577 44. Federation of Animal Science Societies. 2010. Chapter 11: Swine, p. 143–155. *In: Guide*  
578 *for the Care and Use of Agricultural Animals in Research and Teaching*. 3rd ed. Federation of  
579 Animal Science Societies, Champaign, IL. ISBN:978-1-884706-11-0,  
580 [https://www.asas.org/ag\\_guide\\_3rded/HTML5/index.html](https://www.asas.org/ag_guide_3rded/HTML5/index.html)
- 581 45. Kozich JJ, Westcott SL, Baxter NT, Highlander SK, Schloss PD. 2013. Development of a  
582 Dual-Index Sequencing Strategy and Curation Pipeline for Analyzing Amplicon Sequence Data  
583 on the MiSeq Illumina Sequencing Platform. *Appl Environ Microbiol* 79:5112.  
584 doi:10.1128/AEM.01043-13
- 585 46. Wang F, Qiao M, Chen Z, Su J, Zhou X, Zhu Y. 2014. High throughput profiling of  
586 antibiotic resistance genes in urban park soils with reclaimed water irrigation. *Environmental*  
587 *science & technology*. doi:10.1021/es502615e
- 588 47. Quast C, Pruesse E, Yilmaz P, Gerken J, Schweer T, Yarza P, Peplies J, Glöckner FO.  
589 2013. The SILVA ribosomal RNA gene database project: improved data processing and web-  
590 based tools. *Nucleic Acids Res* 41:D590–D596. doi:10.1093/nar/gks1219
- 591 48. Cole JR, Wang Q, Fish JA, Chai B, McGarrell DM, Sun Y, Brown CT, Porras-Alfaro A,  
592 Kuske CR, Tiedje JM. 2013. Ribosomal Database Project: data and tools for high throughput  
593 rRNA analysis. *Nucleic Acids Research* 42:D633–D642. doi:10.1093/nar/gkt1244.

- 594 49. Benjamini Y, Hochberg Y. 1995. Controlling the false discovery rate: a practical and  
595 powerful approach to multiple testing. *Journal of the Royal statistical society: series B*  
596 (Methodological) 57:289–300. doi:10.1111/j.2517-6161.1995.tb02031.x
- 597 50. Hothorn T, Bretz F, Westfall P, Heiberger RM, Schuetzenmeister A, Scheibe S, Hothorn  
598 MT. 2016. Package ‘multcomp.’ Simultaneous inference in general parametric models. R  
599 package version 1.4-12. R Foundation, Vienna, Austria. Vienna, Austria. [https://CRAN.R-](https://CRAN.R-project.org/package=multcomp)  
600 [project.org/package=multcomp](https://CRAN.R-project.org/package=multcomp)
- 601 51. Oksanen J, Blanchet FG, Friendly M, Kindt R, Legendre P, McGlinn D, Minchin PR,  
602 O’Hara RB, Simpson GL, Solymos P, Stevens MHH, Szoecs E, Wagner H. 2019. Vegan:  
603 community ecology package. R package version 2.5-6. R Foundation, Vienna, Austria.  
604 <https://CRAN.R-project.org/package=vegan>
- 605 52. Bastian M, Heymann S, Jacomy M. 2009. Gephi: an open source software for exploring  
606 and manipulating networks. International AAAI Conference on Weblogs and Social Media.  
607 <http://www.aaai.org/ocs/index.php/ICWSM/09/paper/view/154>
- 608 53. Revelle, W. 2019. psych: Procedures for Personality and Psychological  
609 Research, Northwestern University, Evanston, Illinois, USA. R package version 1.9.12. R  
610 Foundation, Vienna, Austria. <https://CRAN.R-project.org/package=psych>
- 611 54. Ruuskanen MO, St Pierre KA, St Louis VL, Aris-Brosou S, Poulain AJ. 2018.  
612 Physicochemical Drivers of Microbial Community Structure in Sediments of Lake Hazen,  
613 Nunavut, Canada. *Front Microbiol* 9:1138–1138. doi:10.3389/fmicb.2018.01138
- 614 55. Krijthe J, van der Maaten L. 2018. Rtsne: T-Distributed Stochastic Neighbor Embedding  
615 Using a Barnes-Hut Implementation. R package version 0.15. R Foundation, Vienna, Austria.  
616 <https://cran.r-project.org/web/packages/Rtsne/index.html>
- 617 56. Hahsler M, Piekenbrock M, Arya S, Mount D. 2019. dbscan: Fast Density-Based  
618 Clustering with R. *Journal of Statistical Software* 91:1-30. R package version 1.15. R

- 619 Foundation, Vienna, Austria. <https://CRAN.R-project.org/package=dbscan>
- 620 57. Jones Z, Linder F. 2017. edarf: Exploratory Data Analysis using Random Forests. Journal  
621 of Open Source Software 1:92. R package version 1.1.1. R Foundation, Vienna, Austria.  
622 <https://CRAN.R-project.org/package=edarf>
- 623 58. Wright MN, Ziegler A. 2017. ranger: A fast implementation of random forests for high  
624 dimensional data in C++ and R. Journal of Statistical Software, 77:1-17. R package version  
625 0.12.1. R Foundation, Vienna, Austria. <https://CRAN.R-project.org/package=ranger>
- 626 59. Menze BH, Kelm BM, Masuch R, Himmelreich U, Bachert P, Petrich W, Hamprecht FA.  
627 2009. A comparison of random forest and its Gini importance with standard chemometric  
628 methods for the feature selection and classification of spectral data. BMC Bioinformatics  
629 10:213–213. doi:10.1186/1471-2105-10-213

## 630 Figures and figure legends

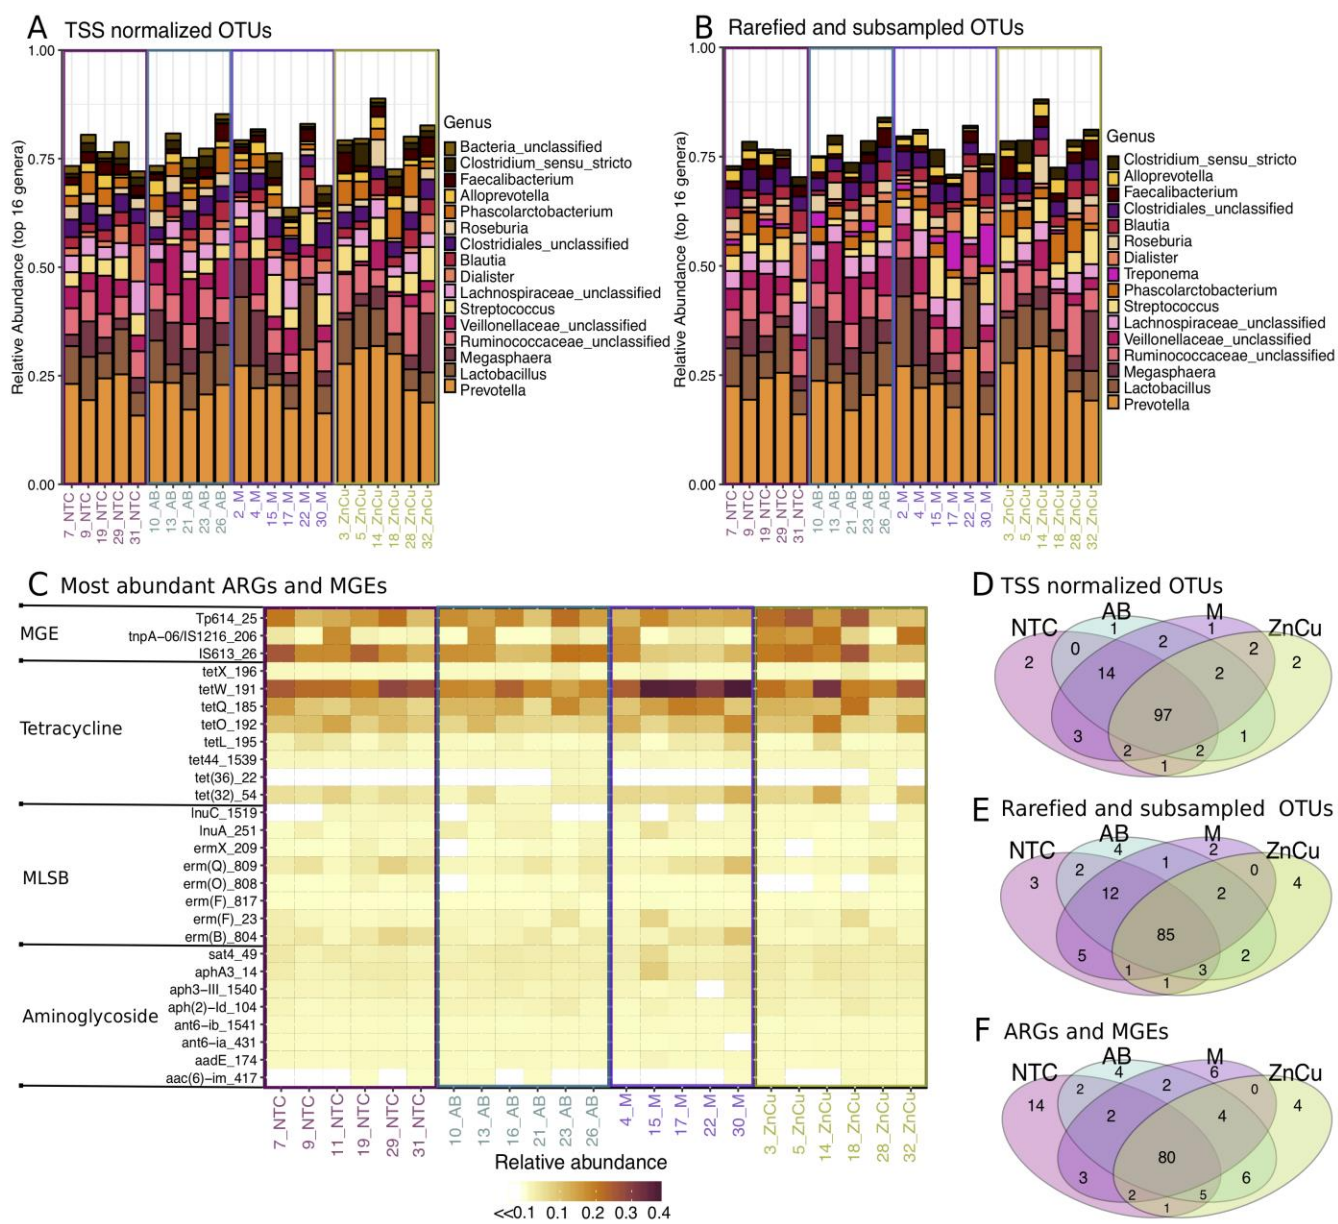

631  
 632 Fig. 1. Comparison of most abundant genera, ARGs and MGEs in different treatment groups.  
 633 Samples on x-axis are grouped according to the treatments and color-coded. Sample names are  
 634 as follows: NTC= Non-treatment control, AB= Carbadox (antibiotic), M= Mushroom powder  
 635 and ZnCu= zinc oxide and copper sulfate. The number in front of the group code denotes the  
 636 number of the pen. (A) Stacked bar plot showing 16 most abundant genera in OTUs normalized  
 637 using total sum scaling (TSS). (B) Stacked bar plot showing 16 most abundant genera in rarefied  
 638 and subsampled OTUs. (C) Most abundant genes related to antibiotic resistance and mobile

639 genetic elements (n=27). Each row represents results of each primer set (assay) (Table S1)  
640 displayed on the y-axis. Assays are grouped according to the antibiotic group which the target  
641 genes confer resistance. MLSB is abbreviation for Macrolide–Lincosamide–Streptogramin B  
642 resistance and MGE for mobile genetic elements. One sample from mushroom powder group  
643 was left out from the qPCR array analysis due to a technical error. (D) Venn diagram showing  
644 the OTUs that are shared between samples belonging into different treatment groups when TSS  
645 normalization was used. (E) Venn diagram showing the OTUs that are shared between samples  
646 belonging into different treatment groups when Rarefying and subsampling was used. (F) Venn  
647 diagram showing the ARGs and MGEs that are shared between samples belonging into different  
648 treatment groups.

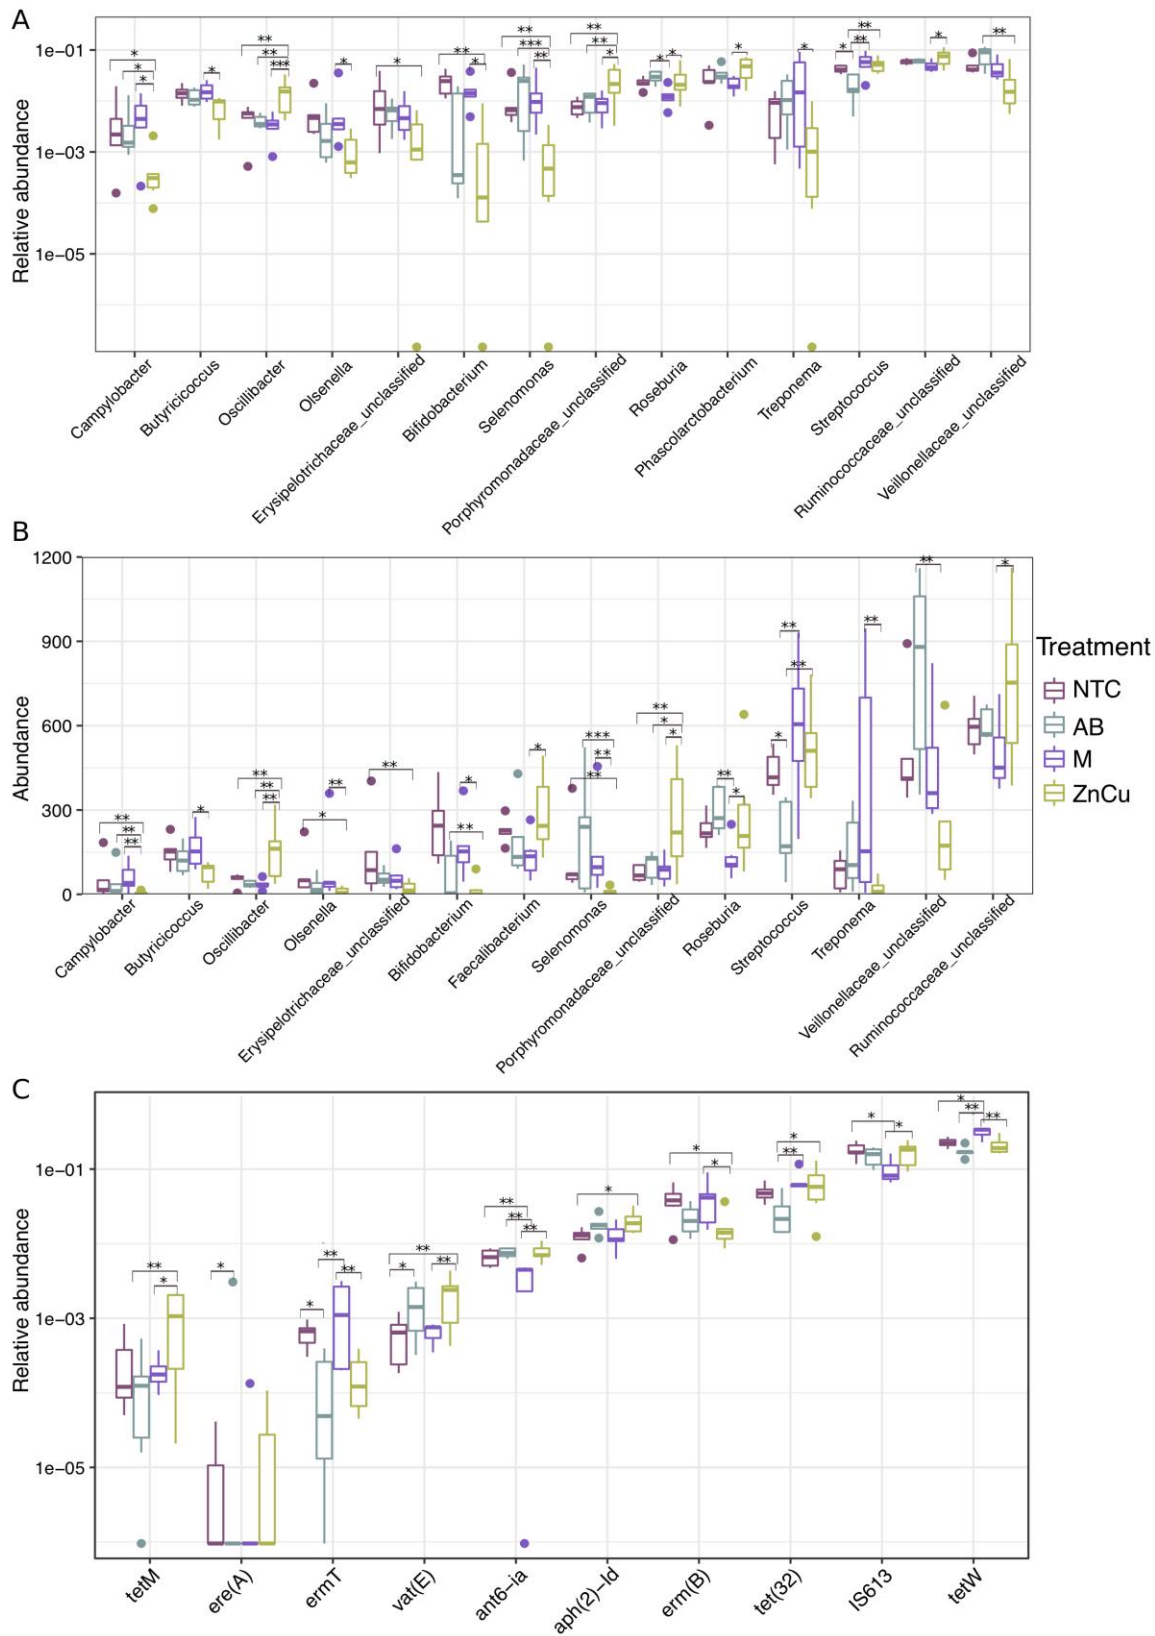

649  
 650 Fig. 2. Boxplots showing the most abundant genera, ARGs and MGEs with statistically  
 651 significant differences between treatment groups labeled on right. NTC= Non-treatment control,  
 652 AB= Carbadox (antibiotic), M= Mushroom powder and ZnCu= zinc oxide and copper sulfate.

653 The asterisks “\*”, “\*\*” and “\*\*\*” denote statistical significance levels at  $p < 0.05$ ,  $p < 0.01$  and  
654  $p < 0.001$ , respectively. (A) Most abundant genera in TSS normalized OTUs (n=14), (B) Most  
655 abundant genera in rarefied and subsampled OTUs (n=14), (C) Most abundant genes related to  
656 resistance and transfer (n=10). See Fig. S3A, B and C for all differentially abundant genera and  
657 ARGs and MGEs and Table S2, S3 and S4 for fold changes of the differently abundant genera  
658 and ARGs and MGEs.  
659



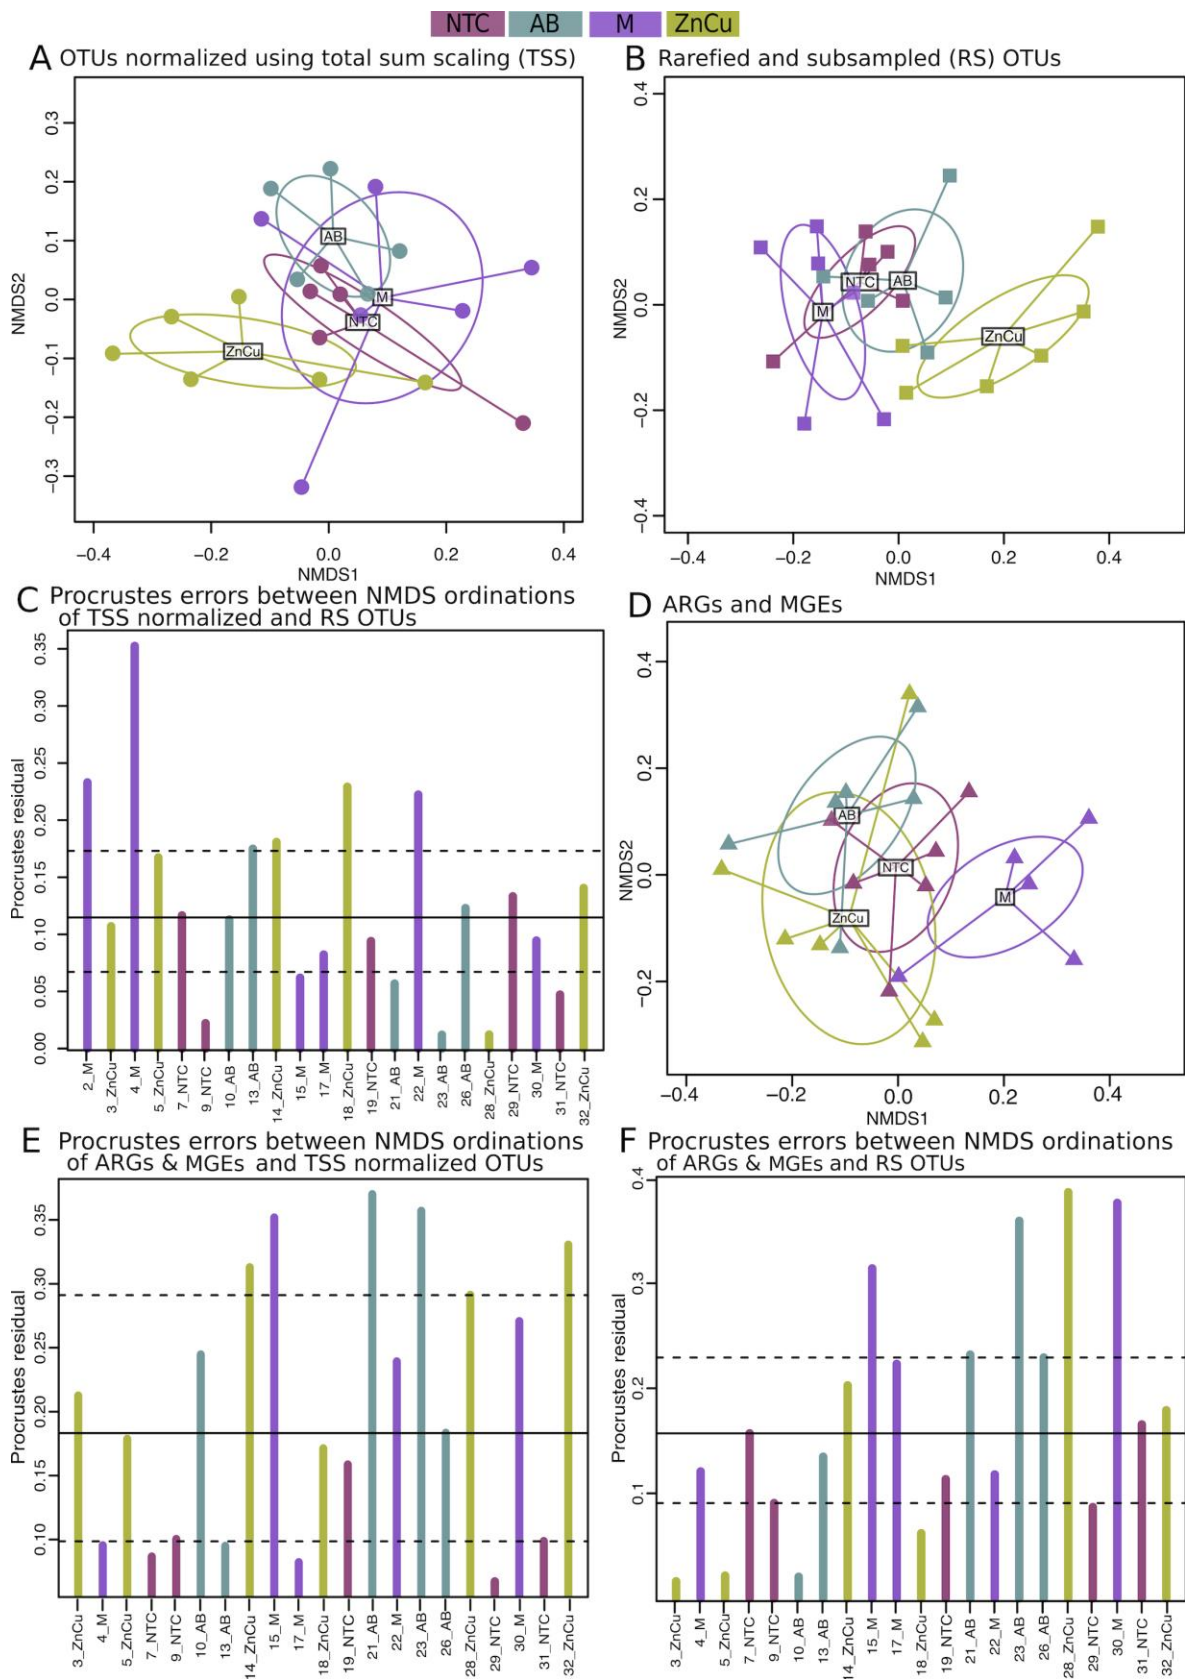

660

661 Fig. 3. NMDS ordinations of TSS normalized OTUs, rarefied and subsampled OTUs and ARGs

662 & MGEs and Procrustes errors between them. Sample names are as follows: NTC= Non-



663 treatment control, AB= Carbadox (antibiotic), M= Mushroom powder and ZnCu= zinc oxide and  
664 copper sulfate. The number in the sample name denotes the number of the pen. (A) NMDS  
665 ordination of TSS normalized OTUs. (B) NMDS ordination of rarefied and subsampled (RS)  
666 OTUs. (C) Procrustes errors between NMDS ordinations of TSS normalized OTUs and rarefied  
667 and subsampled OTUs. (D) NMDS ordination of ARGs and MGEs. (E) Procrustes errors  
668 between NMDS ordinations of TSS normalized OTUs and ARGs & MGEs. (F) Procrustes errors  
669 between NMDS ordinations of rarefied and subsampled OTUs and ARGs & MGEs. The  
670 Procrustes residual error line plots (C, E and F) allow residual error size comparisons. The bars  
671 show the difference in the community structures between the two normalization methods (C) as  
672 well as the differences in community structure and resistome structure in samples belonging to  
673 different treatment groups (E and F). Horizontal lines denote the median (solid), 25% and 75%  
674 quantiles (dashed).

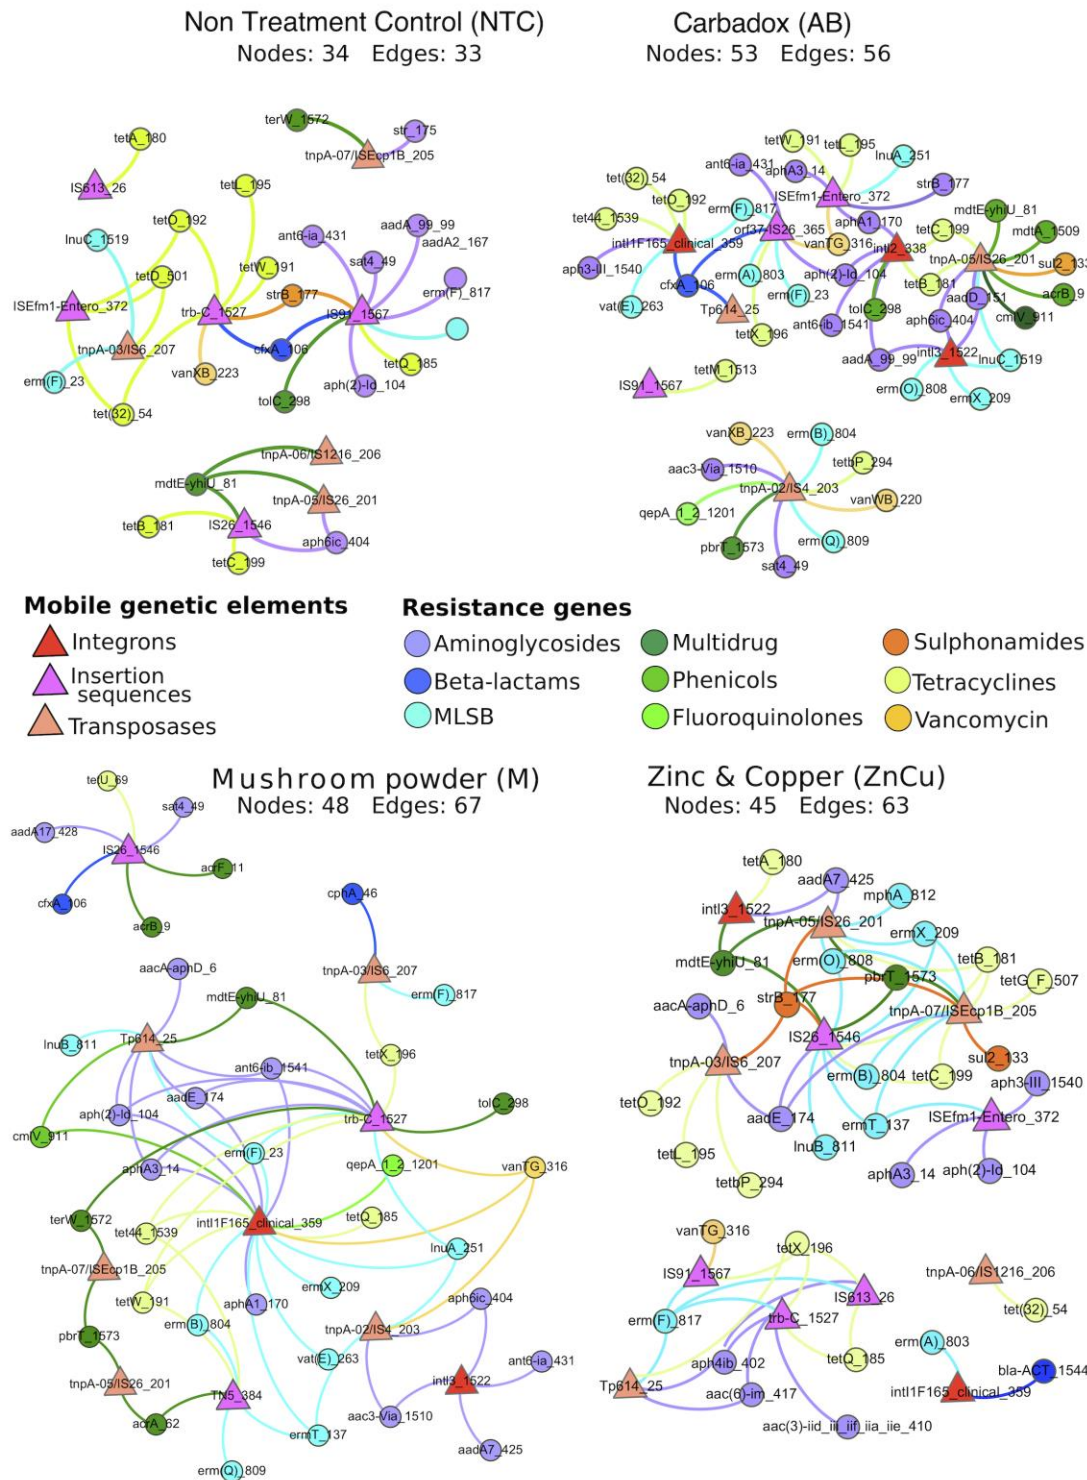

675

676 Fig. 4. Network analysis showing co-occurrence patterns between ARGs and MGEs within the  
 677 samples in different treatment groups. Nodes of the MGEs are triangles, and circle resistance  
 678 gene nodes are colored according to the antibiotic they confer resistance. Edges between  
 679 resistance gene nodes and mobile genetic element nodes have the color of the resistance gene

680 node. Nodes have equal sizes, edges have equal weights, and distance between the nodes is  
 681 irrelevant.

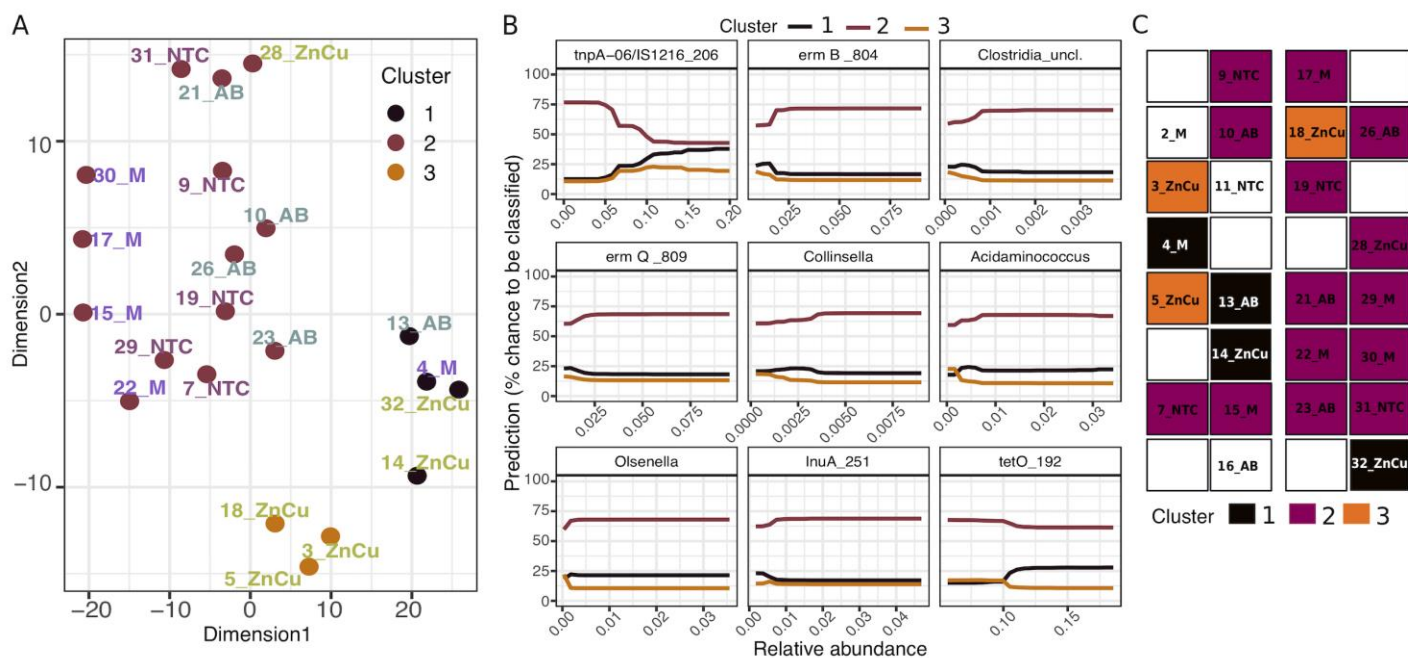

682  
 683 Fig. 5. t-SNE analysis of a dataset containing ARGs, MGEs and TSS normalized OTUs (all  
 684 relative abundances) and the distribution of the pens where experimental pigs were kept. (A) The  
 685 clustering pattern of the samples. (B) Partial dependence plot of cluster numbers and the most  
 686 important predictors in the order of decreasing importance. The partial dependence plot shows  
 687 the effect of each predictor on the model outcome one by one, meanwhile the other predictors are  
 688 fixed to their average value. (C) The physical distribution of the of the experiment pens.

## 689 Supporting information legends

690  
 691 Table S1. List of the used primer sets.

692  
 693 Fig. S1. Correlation between rarefied and subsampled OTUs and TSS normalized OTUs.

694

695 Fig. S2 Composition of positive assays grouped by (A) antibiotic group the targeted gene confers  
696 resistance, (B) resistance mechanism and (C) mobile genetic element group.

697

698 Fig. S3. Differentially abundant genera and genes. Samples on x-axis are grouped according to  
699 the treatments. Sample names are as follows: NTC= Non-treatment control, AB= Carbadox  
700 (antibiotic), M= Mushroom powder and ZnCu= zinc oxide and copper sulfate. The number in  
701 front of the group code denotes the number of the pen. Each row represents abundance of each  
702 genus or the results of each primer set (assay) (Table S1) displayed on the y-axis. Only genera  
703 and genes with statistically significant differences between treatment groups are shown (A)  
704 Differentially abundant genera with TSS normalization. See Table S2 for fold changes. (B)  
705 Differentially abundant genera with Rarefying and subsampling. See Table S3 for fold changes.  
706 (C) Differentially abundant ARGs and MGEs. See Table S4 for fold changes.

707

708 Table S2. Pairwise comparisons of gamma distribution GLMs of relative abundances of each  
709 genera between treatment groups. TSS normalized OTU table was used as the input.

710

711 Table S3. Pairwise comparisons of negative binomial GLMs of abundances of each genera  
712 between treatment groups. Rarefied and subsampled OTU table was used as the input.

713

714 Table S4. Pairwise comparisons of gamma distribution GLMs of relative abundances of each  
715 ARG or MGE between treatment groups.

716

717 Fig. S4. Rarefaction curves. OTU collection curves determined from sequence analysis. Each  
718 line represents one sample. Vertical line shows the subsampling cutoff: 7500 sequences

719

720 Table S5. Assays that had unspecific amplification. Ct values in the negative control and mean

721 Ct-values in samples.

722
